# Supplementary material for: Combinatorial Effects of Transposable Elements on Gene Expression and Phenotypic Robustness in Drosophila melanogaster Development
Source: PubMed Central journal article supplement (PMC3755913; doi:10.1534/g3.113.006791), 2013-09-01
Supplement: supp_g3.113.006791_FigureS1.pdf [file supp_g3.113.006791_FigureS1.pdf]

SUPPLEMENTARY FIGURES

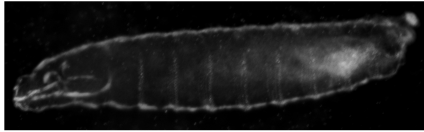

wild-type

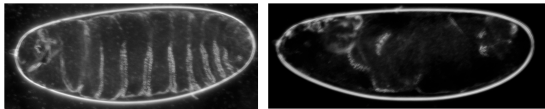

moderately dorsalized: D3 (left) and D2 (right)

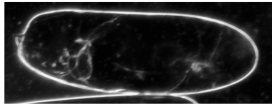

strongly dorsalized: D1

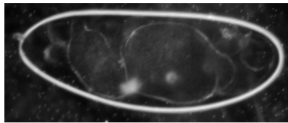

severely dorsalized: D0

**Figure S1.** The spectrum of embryonic dorsalization phenotypes.

Pictures of embryos representative of the dorsalization phenotypes referred to in this paper. Embryonic phenotypes were scored based on pre-existing scale, D0-D3 and wild-type (Wieschaus and Nüsslein-Volhard 1986).
