# Supplementary material for: Combinatorial Effects of Transposable Elements on Gene Expression and Phenotypic Robustness in Drosophila melanogaster Development
Source: PubMed Central journal article supplement (PMC3755913; doi:10.1534/g3.113.006791), 2013-09-01
Supplement: supp_g3.113.006791_FigureS2.pdf [file supp_g3.113.006791_FigureS2.pdf]

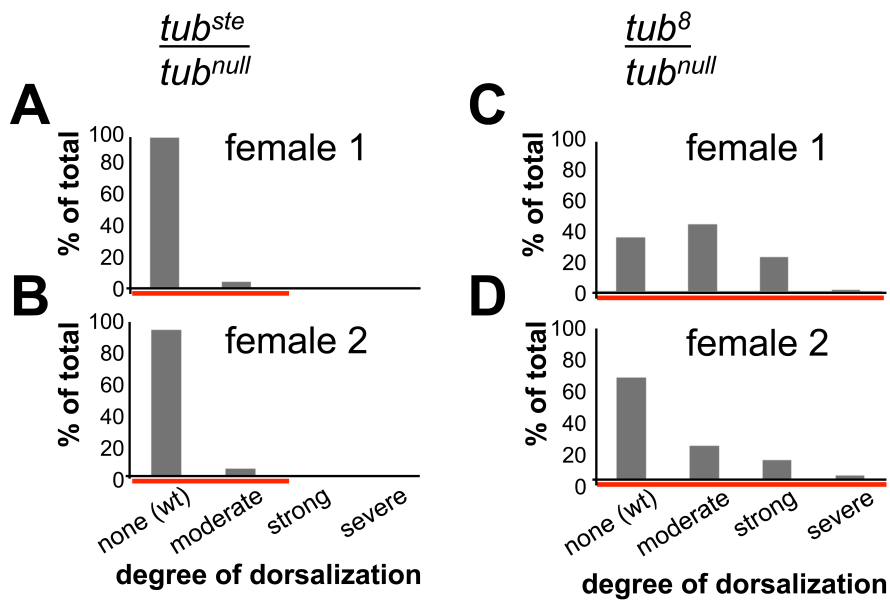

**Figure S2.** Embryos from single females display a range of phenotypes, as is also seen among embryos produced from a population of females of the same genotype.

Single females of specified genotypes were mated with wild-type males. Cuticle phenotypes are represented as the percent of total embryos scored from that female. Compare to Figure 1. **A.**  $tub^{ste}/tub^{null}$  female, n = 156. **B.**  $tub^{ste}/tub^{null}$  female, n = 176. **C.**  $tub^8/tub^{null}$  female, n = 73. **D.**  $tub^8/tub^{null}$  female, n = 80. Red lines highlight range of phenotypes. Dorsalized phenotypes are underrepresented relative to wild-type in this experiment because of the difficulty in recovering small numbers of unhatched embryos.
