# Supplementary material for: Combinatorial Effects of Transposable Elements on Gene Expression and Phenotypic Robustness in Drosophila melanogaster Development
Source: PubMed Central journal article supplement (PMC3755913; doi:10.1534/g3.113.006791), 2013-09-01
Supplement: supp_g3.113.006791_FigureS3.pdf [file supp_g3.113.006791_FigureS3.pdf]

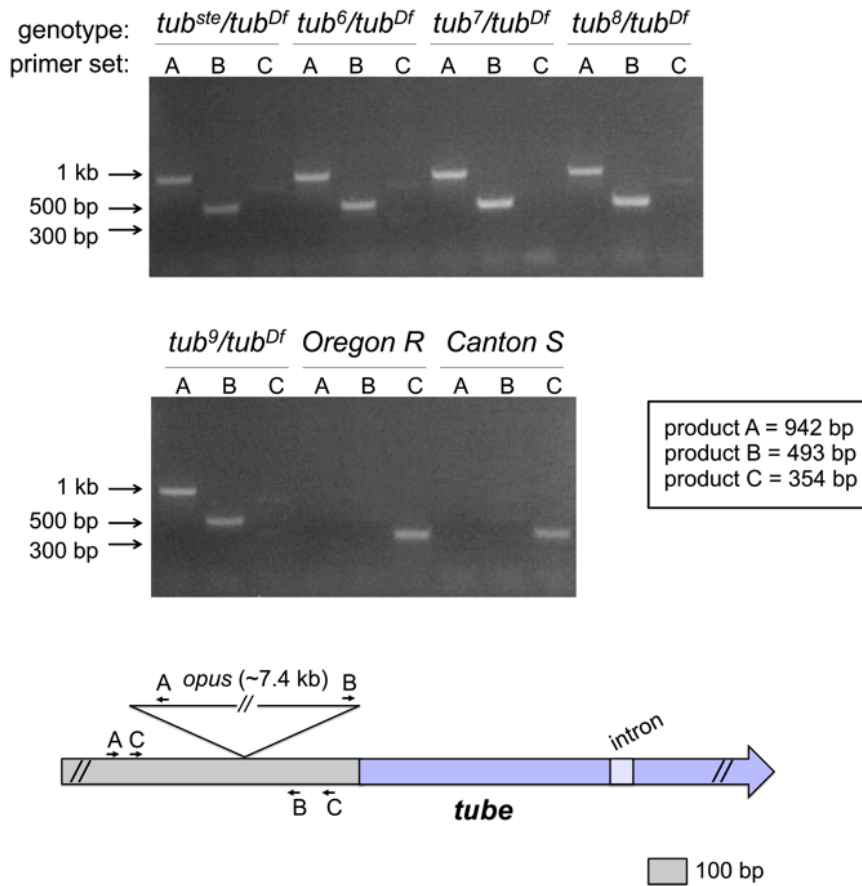

**Figure S3.** The *opus* insertion is present in all *tub<sup>var</sup>* chromosomes and absent from wild-type chromosomes. Genomic DNA from flies of the specified genotype was PCR amplified using three different primer sets to assay for the presence of the *opus* insertion (see diagram at bottom). Primer set A spans the 5' insertion junction, primer set B spans the 3' insertion junction, and primer set C spans the entire insertion (>7 kb in *tub<sup>ste</sup>* chromosome, too large to amplify under given cycling conditions).
