# Supplementary material for: Combinatorial Effects of Transposable Elements on Gene Expression and Phenotypic Robustness in Drosophila melanogaster Development
Source: PubMed Central journal article supplement (PMC3755913; doi:10.1534/g3.113.006791), 2013-09-01
Supplement: supp_g3.113.006791_FigureS4.pdf [file supp_g3.113.006791_FigureS4.pdf]

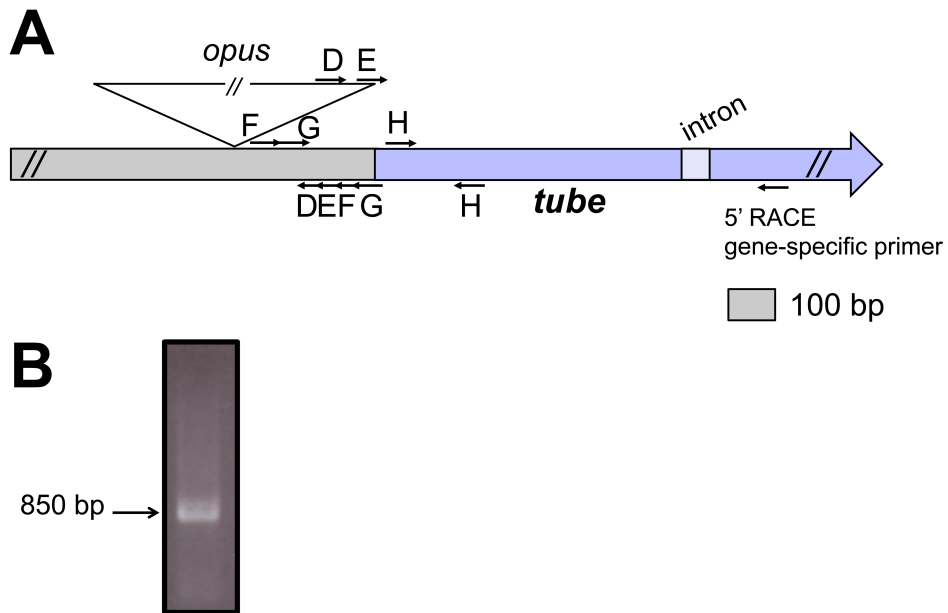

**Figure S4.** Downregulation of *tube* by *opus* insertion does not depend on an alternative transcription start site.

**A.** Schematic of primer locations for quantitative RT-PCR and 5' RACE to assay for use of an alternative transcription start site in embryos from *tub<sup>ste</sup>/tub<sup>null</sup>* females. Quantitative RT-PCR primer sets are labeled D-H. Products were detected from primer set H, but not from primer sets D-G.

**B.** Results from 5' RACE using RNA prepared from embryos from *tub<sup>ste</sup>/tub<sup>null</sup>* females. Expected size of *tube* transcript originating from wild-type transcription start site was 830 bp.
