# Supplementary material for: Combinatorial Effects of Transposable Elements on Gene Expression and Phenotypic Robustness in Drosophila melanogaster Development
Source: PubMed Central journal article supplement (PMC3755913; doi:10.1534/g3.113.006791), 2013-09-01
Supplement: supp_g3.113.006791_FigureS5.pdf [file supp_g3.113.006791_FigureS5.pdf]

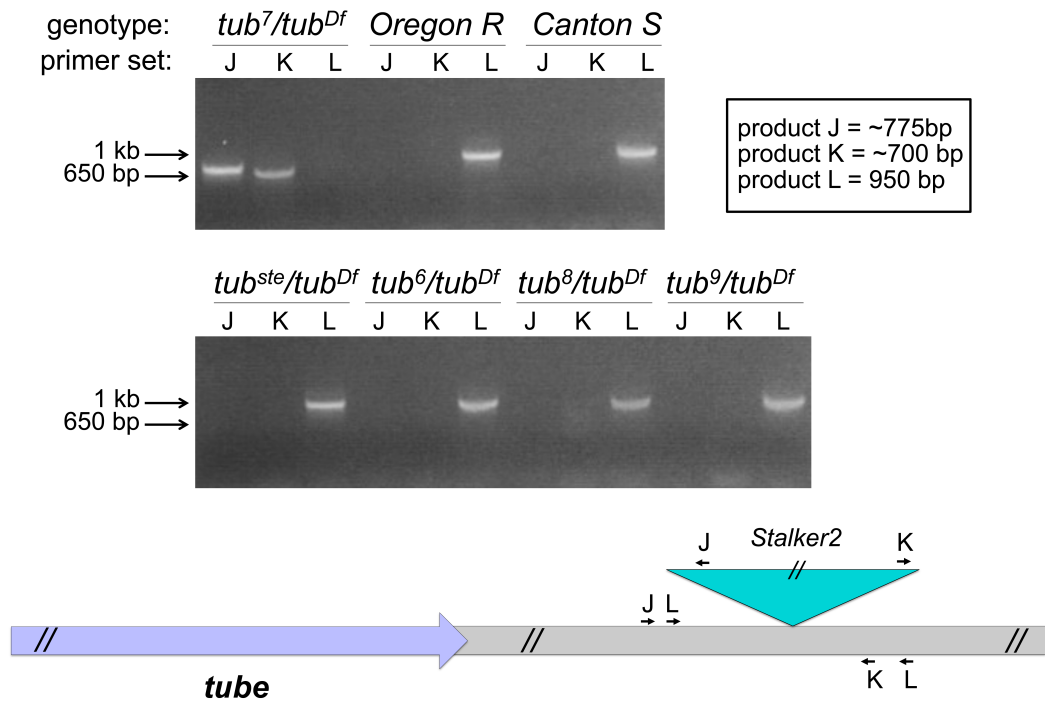

**Figure S5.** The downstream *Stalker2* insertion appears to be unique to  $tub^7$ .

Genomic DNA from flies of the specified genotypes was PCR amplified using three different primer sets to assay for the presence of the *Stalker2* insertion (see diagram at bottom). Primer set J spans the 5' insertion junction, primer set K spans the 3' insertion junction, and primer set L spans the entire insertion (>8 kb in  $tub^7$  chromosome, too large to amplify using given cycling conditions).
