# Supplementary material for: Combinatorial Effects of Transposable Elements on Gene Expression and Phenotypic Robustness in Drosophila melanogaster Development
Source: PubMed Central journal article supplement (PMC3755913; doi:10.1534/g3.113.006791), 2013-09-01
Supplement: supp_g3.113.006791_TableS1.pdf [file supp_g3.113.006791_TableS1.pdf]

**Table S1.** Polymorphisms found in *tub<sup>ste</sup>* chromosome within the 25 kb region determined via site-specific recombination to be responsible for the *tub<sup>ste</sup>* variable phenotype. Sequence polymorphisms are relative to the reference genome and a functional *tube* cDNA (Celniker *et al.* 2002; Letsou *et al.* 1993); all were also found in *tub<sup>7</sup>* and *tub<sup>8</sup>*. Locations of site-specific recombination sites and of the beginning and end of the *tube* transcription unit are noted under Reference Points.

### Polymorphisms

| Description                        | Location              |
|------------------------------------|-----------------------|
| 4 bp deletion (TTAG)               | 3R: 205,032 - 205,035 |
| Single base substitution (A > G)   | 3R: 206,259           |
| 1 bp deletion (T)                  | 3R: 207,180           |
| 4 bp deletion (ATTT)               | 3R: 213,067 - 213,070 |
| 7,400 bp insertion ( <i>opus</i> ) | 3R: 213,161           |
| Single base substitution (T > A)   | 3R: 219,883           |
| Single base substitution (G > C)   | 3R: 220,488           |
| Two base substitution (GC > AA)    | 3R: 223,222 - 223,223 |

### Reference points

| Description                           | Location    |
|---------------------------------------|-------------|
| Proximal recombination site           | 3R: 204,648 |
| <i>tube</i> transcription start site  | 3R: 213,460 |
| End of <i>tube</i> transcription unit | 3R: 215,536 |
| Distal recombination site             | 3R: 223,611 |
